# Supplementary material for: An optimized LiNO3/DMSO electrolyte for high-performance rechargeable Li–O2 batteries
Source: Royal Society of Chemistry journal article supplement (doi:10.1039/c3ra47372d), 2014-01-01
Supplement: c3ra47372d1.pdf [file c3ra47372d1.pdf]

## An optimized LiNO<sub>3</sub>/DMSO electrolyte for high-performance rechargeable Li-O<sub>2</sub> batteries

Bing Sun, Xiaodan Huang, Jinqiang Zhang, Shuangqiang Chen and Guoxiu Wang\*

Centre for Clean Energy Technology, School of Chemistry and Forensic Science, University of Technology Sydney, Broadway, Sydney, NSW 2007, Australia

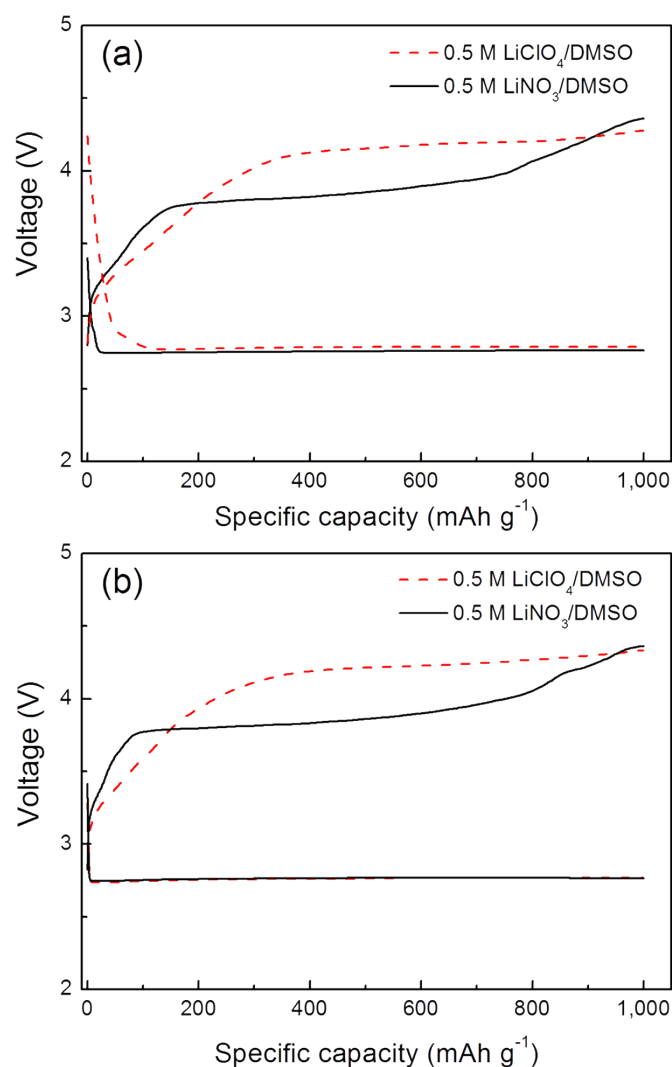

**Fig. S1** Charge/discharge voltage curves of Li-O<sub>2</sub> batteries with (a) Super-P carbon black and (b) Vulcan XC-72 carbon as the cathode catalysts in two DMSO based electrolytes.

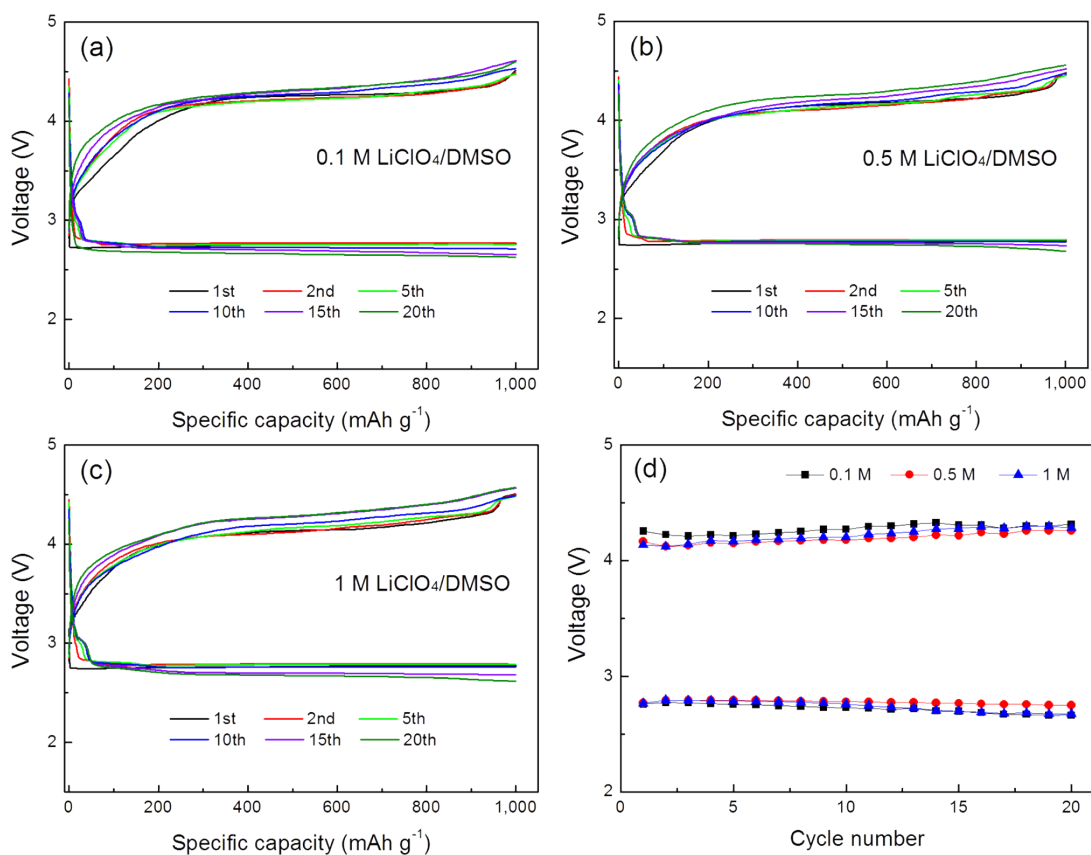

**Fig. S2** (a – c) Charge/discharge curves of Li-O<sub>2</sub> batteries in DMSO-based electrolyte with different concentration of LiClO<sub>4</sub>. (d) The mean voltages of charge and discharge vs. cycle number.

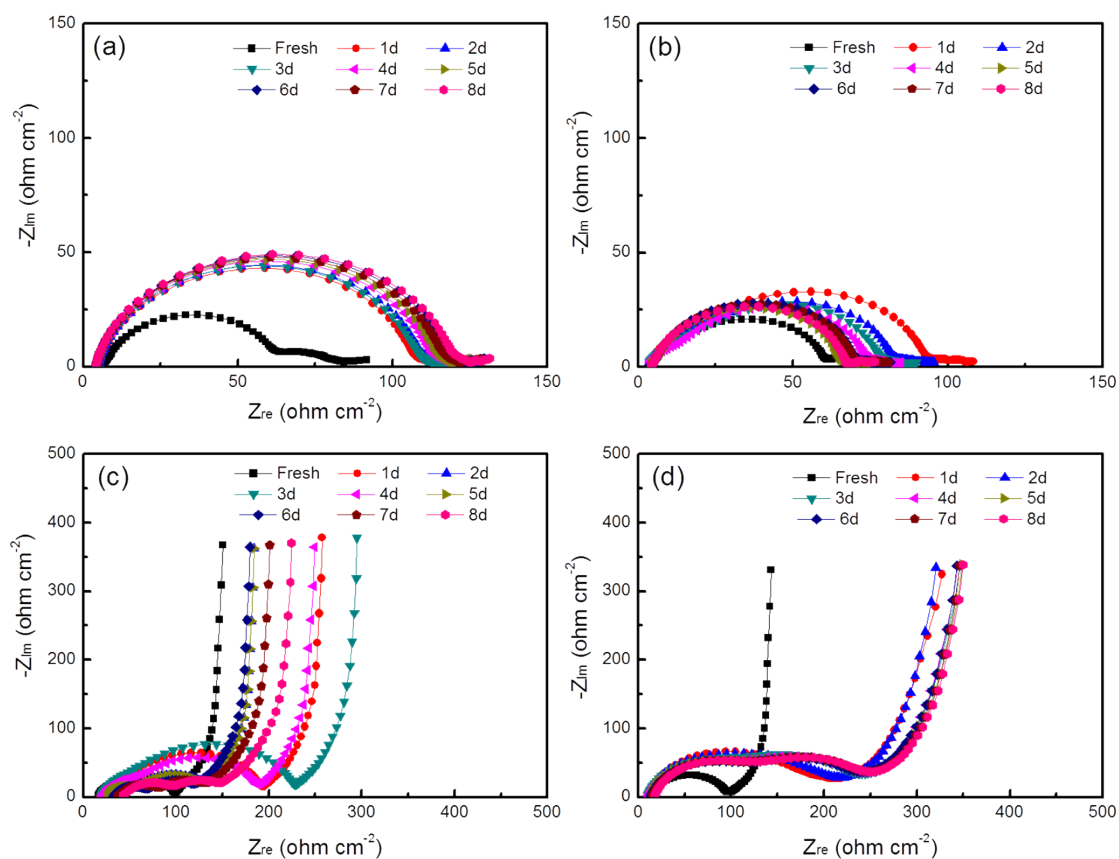

**Fig. S3** EIS spectra of symmetric Li/Li cells store for 8 days in (a)  $\text{LiClO}_4/\text{DMSO}$  electrolyte, (b)  $\text{LiNO}_3/\text{DMSO}$  based electrolyte at open circuit voltage. EIS spectra of Li- $\text{O}_2$  cells store for 8 days in (c)  $\text{LiClO}_4/\text{DMSO}$  electrolyte, (d)  $\text{LiNO}_3/\text{DMSO}$  based electrolyte at open circuit voltage.
